# Supplementary material
Source: PubMed Central journal article supplement (PMC5193244)
Supplement: NIHMS833250-supplement-1.pdf [file NIHMS833250-supplement-1.pdf]

## Supplemental Experimental Procedures

*Table of Clinical Scores on a 7-point scale*

| SCORE | INITIALS | DESCRIPTION      | APPEARANCE                                                                   | MOBILITY                                                                                                  | ATTITUDE                                     |
|-------|----------|------------------|------------------------------------------------------------------------------|-----------------------------------------------------------------------------------------------------------|----------------------------------------------|
| 1     | H        | Healthy          | Smooth Coat. Bright Eyes.                                                    | Active, Scurrying, Burrowing                                                                              | Alert                                        |
| 2     | SR       | Slightly Ruffled | Slightly Ruffled Coat (Usually Only Around Head And Neck)                    | Active, Scurrying, Burrowing                                                                              | Alert                                        |
| 3     | R        | Ruffled          | Ruffled Coat Throughout Body. A “Wet” Appearance.                            | Active, Scurrying, Burrowing                                                                              | Alert                                        |
| 4     | S        | Sick             | Very Ruffled Coat. Slightly Closed, Inset Eyes.                              | Walking, But No Scurrying.                                                                                | Mildly Lethargic                             |
| 5     | VS       | Very Sick        | Very Ruffled Coat. Closed, Inset Eyes.                                       | Slow To No Movement. Will Return To Upright Position If Put On Its Side.                                  | Extremely Lethargic                          |
| 6     | E        | Euthanize        | Very Ruffled Coat. Closed, Inset Eyes. Moribund Requiring Humane Euthanasia. | No Movement Or Uncontrollable, Spastic Movements. Will NOT Return To Upright Position If Put On Its Side. | Completely Unaware Or In Noticeable Distress |
| 7     | D        | Deceased         | ---                                                                          | ---                                                                                                       | ---                                          |

### *qRT-PCR Primer Sequences and Cycling Conditions*

The primer sequences were as seen in the following table.

|                | Sequence 5'-3'                             |
|----------------|--------------------------------------------|
| Probe          | 6-FAM-CGGCATAACAGCATCAGGTGCATAGGAG-Tamra-Q |
| Forward Primer | TTGGTCATGATACTGCTGATTGC                    |
| Reverse Primer | CCTTCCACAAAGTCCCTATTGC                     |

Cycling conditions were as follows: 45°C for 15 min, 95°C for 15 min, followed by 50 cycles of 95°C for 15 sec and 60°C for 15 sec and a final extension of 72°C for 30 min. Viral RNA concentration was determined based on an internal standard curve composed of five 100-fold serial dilutions of an *in vitro* transcribed RNA based on ZIKV strain FSS13025.

### *Enzyme immunohistochemistry*

Following deparaffinization, slides were microwaved in Antigen Unmasking Solution (Vector Laboratories). Endogenous peroxidase activity was blocked by incubation in Bloxall (Vector Laboratories), and nonspecific protein binding was blocked by incubation in 10% goat serum. Slides were then incubated in rabbit anti-ZIKV NS2B antibody (Genetex) diluted at 1:100, ImmPRESS HRP anti-rabbit IgG (Vector Laboratories), and NovaRED HRP Substrate (Vector Laboratories). Slides were routinely counterstained with hematoxylin. For each slide, an irrelevant control antibody was performed with Rabbit IgG (Vector Laboratories) substituted for the anti-ZIKV NS2B antibody, and known infected and uninfected controls were included for each batch. A board-certified veterinary pathologist, who was blinded to each slide's experimental conditions, read and scored each slide for immunoreactivity.

### *Image Acquisition*

Bright field imaging was performed with a Zeiss Axio Scan.Z1 microscope and the images were acquired using Zen 2 software (Carl Zeiss).
